# Supplementary material
Source: PubMed Central journal article supplement (PMC9979016)
Supplement: jamapsychiatry-e230010-s002.pdf [file jamapsychiatry-e230010-s002.pdf]

## Data Sharing Statement

Peciña. Dynamic Feedback Between Antidepressant Placebo Expectancies and Mood. *JAMA Psychiatry*. Published March 01, 2023. doi:10.1001/jamapsychiatry.2023.0010

### Data

**Data available:** No

### Additional Information

**Explanation for why data not available:** Unless asked.
